## LDL-C plays a causal role on T2DM: a Mendelian randomization analysis

Wenbin Pan<sup>1</sup>, Weiju Sun<sup>2</sup>, Shuo Yang<sup>3</sup>, He Zhuang<sup>3</sup>, Huijie Jiang<sup>1</sup>, Hong Ju<sup>4</sup>, Donghua Wang<sup>5</sup>, Ying Han<sup>6</sup>

<sup>1</sup>Department of Radiology, The Second Affiliated Hospital of Harbin Medical University, Harbin, China

<sup>2</sup>Cardiovascular Department, The First Affiliated Hospital of Harbin Medical University, Harbin, China

<sup>3</sup>College of Bioinformatics Science and Technology, Harbin Medical University, Harbin, China

<sup>4</sup>Department of Information Engineering, Heilongjiang Biological Science and Technology Career Academy, Harbin, China

<sup>5</sup>Department of General Surgery, Heilongjiang Province Land Reclamation Headquarters General Hospital, Harbin, China

<sup>6</sup>Cardiovascular Department, The Fourth Affiliated Hospital of Harbin Medical University, Harbin, China

**Correspondence to:** Huijie Jiang, Ying Han, Donghua Wang; **email:** [jianghuijie@hrbmu.edu.cn](mailto:jianghuijie@hrbmu.edu.cn), [flhy81@gmail.com](mailto:flhy81@gmail.com), [wangdonghua7885@126.com](mailto:wangdonghua7885@126.com)

**Keywords:** low-density lipoprotein cholesterol, type 2 diabetes mellitus, casual effect, Mendelian randomization, type 1 diabetes mellitus

**Received:** August 26, 2019

**Accepted:** January 12, 2020

**Published:** February 10, 2020

**Copyright:** Pan et al. This is an open-access article distributed under the terms of the Creative Commons Attribution License (CC BY 3.0), which permits unrestricted use, distribution, and reproduction in any medium, provided the original author and source are credited.

### ABSTRACT

Diabetic dyslipidemia is a common condition in patients with Type 2 diabetes mellitus (T2DM). However, with the increasing application of statins which mainly decrease low-density lipoprotein cholesterol (LDL-C) levels, clinical trials and meta-analysis showed a clearly increase of the incidence of new-onset DMs, partly due to genetic factors. To determine whether a causal relationship exists between LDL-C and T2DM, we conducted a two-sample Mendelian Randomization (MR) analysis using genetic variations as instrumental variables (IVs). Initially, 29 SNPs significantly related to LDL-C ( $P \leq 5.0 \times 10^{-8}$ ) were selected as based on results from the study of Henry et al, which processed loci data influencing lipids identified by the Global Lipids Genetics Consortium (GLGC) from 188,577 individuals of European ancestry. While 6 SNPs related to T2DM ( $P$  value  $< 5 \times 10^{-2}$ ) were deleted, with the remaining 23 SNPs without LD eventually being deemed as IVs. The combined effect of all these 23 SNPs on T2DM, as generated with use of the penalized robust inverse-variance weighted (IVW) method (Beta value 0.24, 95%CI 0.087~0.393, P-value=0.002) demonstrated that elevated LDL-C levels significantly increased the risk of T2DM. The relationship between LDL-C and Type 1 diabetes mellitus (T1DM) with this analysis producing negative pooled results (Beta value -0.202, 95%CI -2.888~2.484, P-value=0.883).

### INTRODUCTION

Type 2 diabetes mellitus (T2DM) has become a global epidemic and major public health concern of late. The worldwide prevalence in adults aged 20-79 years has risen to 8.8% in 2017 and is expected to increase to 9.9% by the year 2045, with the result being that 9.5 billion adults will

have diabetes [1] (<https://diabetesatlas.org/>). Diabetes is a leading cause of cardiovascular disease and is associated with premature morbidity and mortality [2].

As one of the major conditions associated with DM, diabetic dyslipidemia, has been reported to be closely and causally related to the genesis and the progression of

atherosclerosis [3–5]. Diabetic dyslipidemia is quite common among patients with T2DM, with a prevalence ranging from 75–82%, while only 10% of DM patients with type 1 diabetes tend to show dyslipidemia [6]. With regard to the CV risk associated with DM, an important factor involves controlling levels of the low-density lipoprotein cholesterol (LDL-C) below a certain value as recommended by current guidelines [7–10]. One approach to decrease LDL-C levels is with use of statins. However, results from clinical trials and meta-analysis have indicated a clear statins induced dose-dependent increase in the incidence of new-onset DMs, particularly in patients with abnormal carbohydrate homeostasis [11–17]. Moreover, it has been suggested that the risk of T2DM, as associated with statin therapy, can be attributed to a genetic predisposition for increased levels of LDL-C in patients with a lower incidence of T2DM [18–20]. Therefore, it is important to determine whether a causal relationship exists between LDL-C and T2DM.

Use of randomized controlled trials to reveal causality can be problematic. In particular, these involve time-consuming procedures and are prone to confounding, reverse causality (i.e. disease processes affect exposure) and various other biases, which hinder, if not mislead, conclusions regarding associations between exposure factors and disease etiology [21, 22]. Therefore, incorporating the natural randomization inherent in the generation of genetic individuality, as can be accomplished with use of the Mendelian randomization (MR) method, provides a useful complement to traditional epidemiological studies [23, 24]. MR uses genetic variants as an instrumental variable (IV) to estimate and assess casual relationships between exposure of interest and outcomes [25–28] (Figure 1).

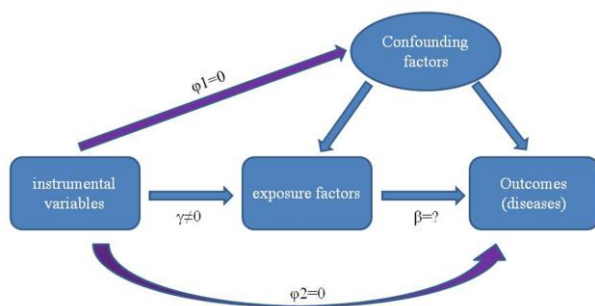

**Figure 1. Principles of using genetic variants as instrumental variable to estimate the causal influence of exposure factors on disease.** There is a strong correlation between genetic variation and exposure factors ( $\gamma \neq 0$ ), and the genetic variation is independent of the confounding factors affecting the relationship between “exposure factors -outcomes” ( $\phi_1=0$ ). Furthermore, genetic variation can only affect the outcomes through exposure factors but not other paths ( $\phi_2 = 0$ ).

A major asset of the MR method is that genetic variation produces differences between individuals that influence health outcomes that are not affected by confounding or reverse causal bias which may distort the observations [24, 29, 30]. Moreover, the ability to combine large numbers of genetic variant data from genome-wide association studies (GWASs) with data from large numbers of disease outcome GWASs and various of databases enables MR to conduct comprehensive investigations as achieved with use of the two-sample MR analysis method [30–33].

Therefore, the goal of this report was to assess causal effects of LDL-C as related to the risk of T2DM using the two-sample MR approach. The causality between LDL-C and type 1 diabetes Mellitus (T1DM) was also investigated as a means to verify whether LDL-C demonstrates a specific causal relationship with T2DM or a more generalized relationship with all subtypes of diabetes.

## RESULTS

### IVs chosen for analysis

There were 29 SNPs that were significantly related to LDL-C ( $P \leq 5.0 \times 10^{-8}$ ) as based on Henry et. al.’s study [35] in Set1, while 6 SNPs related to T2DM ( $P$  value  $< 5 \times 10^{-2}$ ) were deleted and 23 SNPs were remained in Set2. As these 23 SNPs were assessed to be without LD, they were deemed as IVs in Set 3. Information on each of the 23 SNPs selected for analysis, in particular Beta coefficients of the SNP on the risk of LDL-C and T2DM and SEs, are listed in Table 1.

### IVW results

Figure 2 contains the forest plot of estimates and 95% CIs representing the effect of each SNP of Set 3 on T2DM. The combined effect of all 23 SNPs on T2DM, as generated with the use of the IVW method, are shown in Table 2. The Beta value of elevated LDL-C associated with T2DM was 0.25 (95%CI 0.105~0.395,  $P$ -value=0.001). Similar Beta values were obtained using penalized IVW (Beta value 0.25; 95%CI 0.105~0.395;  $P$ -value=0.001), robust IVW (Beta value 0.24; 95%CI 0.087~0.393,  $P$ -value=0.002) and penalized robust IVW (Beta value 0.24, 95%CI 0.087~0.393,  $P$ -value=0.002) (Table 2). Taken together, these results demonstrate that elevated LDL-C levels significantly increased the risk of T2DM.

Table 3 shows the sensitivity analysis result of SNPs based on leave-one-out validation. The estimate have a great change after removing rs1367117 or rs11220462 but not after removing other SNPs. These results

**Table 1. Information on each of the 23 SNPs.**

| SNP        | phenotype_Beta | phenotype_SE | disease_SE  | disease_Beta |
|------------|----------------|--------------|-------------|--------------|
| rs267733   | 0.0331         | 0.0053       | 0.019802627 | -0.020408163 |
| rs2710642  | 0.0239         | 0.0038       | 0.009950331 | 0.015306122  |
| rs10490626 | 0.0508         | 0.0069       | 0.009950331 | -0.030612245 |
| rs2030746  | 0.0214         | 0.0038       | 0.009950331 | 0.015306122  |
| rs1250229  | 0.0243         | 0.0042       | 0.009950331 | 0.015306122  |
| rs7640978  | 0.0392         | 0.0069       | 0           | -0.030612245 |
| rs17404153 | 0.0336         | 0.0054       | 0           | -0.020408163 |
| rs4530754  | 0.0275         | 0.0036       | 0.019802627 | 0.015306122  |
| rs4722551  | 0.0391         | 0.0049       | 0           | 0.025510204  |
| rs10102164 | 0.0316         | 0.0045       | 0.029558802 | 0.015306122  |
| rs4942486  | 0.0243         | 0.0037       | 0.009950331 | -0.015306122 |
| rs364585   | 0.0249         | 0.0038       | 0.009950331 | 0.015306122  |
| rs2328223  | 0.0299         | 0.005        | 0.029558802 | 0.020408163  |
| rs5763662  | 0.0767         | 0.0121       | 0.029558802 | 0.025510204  |
| rs2479409  | 0.0642         | 0.0041       | 0.009950331 | -0.015306122 |
| rs1367117  | 0.1186         | 0.004        | 0.019802627 | 0.015306122  |
| rs4299376  | 0.0812         | 0.0045       | 0.009950331 | -0.015306122 |
| rs3757354  | 0.0382         | 0.0044       | 0           | -0.015306122 |
| rs1800562  | 0.0615         | 0.008        | 0.019802627 | -0.045918367 |
| rs11220462 | 0.059          | 0.0059       | 0.019802627 | 0.015306122  |
| rs8017377  | 0.0303         | 0.0038       | 0.019802627 | 0.020408163  |
| rs7206971  | 0.0292         | 0.0055       | 0.009950331 | 0.015306122  |
| rs6029526  | 0.0436         | 0.0052       | 0.019802627 | 0.015306122  |

SE, standard error.

demonstrated that rs1367117 or rs11220462 drive the Penalized robust IVW estimate.

Table 4 contains results from the combined effects of SNPs on T1DM. No statistically significant positive association was obtained between LDL-C and T1DM as revealed from the Beta (0.019, 95%CI -0.009~0.048, P-value=0.178), as well as from the robust IVW (Beta 0.014, 95%CI -0.003~0.031, P-value=0.099) and penalized robust IVW (Beta -0.202, 95%CI -2.888~2.484, P-value=0.883). Accordingly, LDL-C shows a specific relationship with T2DM, but not T1DM.

The pleiotropic effects of these SNPs (IVs) were further estimated with use of robust and Penalized robust MR-Egger analyses. Results from these analyses revealed a Beta value of 0.062 (95%CI: -0.224~0.348, P=0.135) with an intercept of 0.011 (95% CI -0.003 to 0.025, P = 0.135). These findings indicate that a potential

horizontal pleiotropic effect could bias our estimates (Table 2).

## DISCUSSION

In this report, we utilized a two-sample MR approach to expose potential causal effects of LDL-C on the risk of T2DM. The 29 SNPs showing a significant correlation with LDL-C were extracted from results of the study by Henry et al [34] who reported causal effects between LDL-C and colorectal cancer. However, 6 SNPs related to T2DM were deleted. Data on the associations between SNPs and T2DM were sourced from diabetes genetics replication and meta-analysis (DIAGRAM) consortium. The remaining 23 SNPs without LD were then used as the IVs. Results from IVW and Penalized IVW methods, as well as from the robust IVW and Penalized robust IVW methods reveal that elevated LDL-C levels have a causal effect on the risk of T2DM.

Results from randomized controlled trials and meta-analysis had indicated that lipid lowering treatment may increase the risk of T2DM [12–18]. And, results from the longitudinal Framingham Heart Study, also suggested that low LDL-C levels were associated with T2DM. Accordingly, a notable relationship between LDL-C and T2DM was apparent, with lipid-lowering treatment being associated with increased risks of T2DM [35]. However, the overall average results from 10-year follow-up data (N = 1,819) in non-diabetic first-degree relatives of consecutive patients with T2DM 30-70 years old, not treated with lipid-lowering drugs, revealed that a higher LDL-C level was significantly associated with a higher risk of T2DM, independent of age, gender, fasting plasma glucose, waist circumference or blood pressure [36]. Therefore, based upon these findings, the role of LDL-C as a causal risk factor for T2DM remained uncertain.

Here, we utilize MR, a technique which can provide robust and reliable evidence, as a means for assessing the relationship between LDL-C and T2DM. A number of factors contribute to the strength of our findings. First, all of the data on SNPs as associated with LDL-C and SNPs as associated with T2DM were obtained from large-scale GWASs. Previous studies employing MR used only a single genetic variant and the association between a specific risk factor and disease were limited to a single study population. Recently, increasing use of

genome-wide association studies (GWAS) have resulted in a large amount of genotype-phenotype association data and genotype-disease association data. Such data allows for numerous genetic variants identified from many exposures to be used in MR analysis, which enables the ability to acquire comprehensive information regarding associations between exposure factors and disease etiology [30].

Second, all of the 23 SNPs significantly related to LDL-C (P value <  $5 \times 10^{-8}$ ), but not related to T2DM, were extracted as the IVs. Swerdlow et al. [18] assessed associations between SNPs (rs17238484 and rs12916) of 3-hydroxy-3-methylglutaryl-coenzyme A reductase (HMGCR) and the prevalence and incidence of T2DM by meta-analysis in 223,463 individuals from 43 genetic studies. Their results indicated that the rs17238484-G allele seemed to be associated with a higher risk of type 2 diabetes (OR per allele 1.02, 95% CI 1.00-1.05) and the rs12916-T allele association was consistent (1.06, 1.03-1.09). Similar results were reported by Ference et al. [37]. They compared the effects of lower LDL-C cholesterol levels that were mediated by variants in proprotein convertase subtilisin-kexin type 9 (PCSK9), HMGCR, or both on the risk of cardiovascular events and risk of diabetes in 112,772 participants from 14 studies with use of the MR method. Variants in these two genes were associated with very similar effects on the risk of diabetes: OR for each 10 mg per deciliter decrease in LDL-C cholesterol was 1.11 (95% CI, 1.04 to 1.19) for PCSK9 and 1.13 (95% CI, 1.06 to 1.20) for HMGCR. Similar results were observed with regard to the risk for cardiovascular events. However, these studies only focused on genetic variants in HMGCR and PCSK9, which are the intended drug targets, rather than all SNPs related to LDL-C. In this way, they failed to fully explain the relationship between LDL-C and T2DM as was accomplished in our current study.

Finally, in this report we utilized the most recent methodological developments of MR, including Penalized IVW, Robust IVW and Penalized robust IVW methods, as sensitivity analyses to provide additional means for investigating any pleiotropic effects of the genetic variants. To serve as a valid instrument, genetic variants must satisfy the assumptions of a strong correlation with exposure but an absence of pleiotropic effects with the outcomes. However, due to the complexities of biological effects, pleiotropic effects of variants are often unavoidable. To avert such an eventuality it is necessary to evaluate the sensitivity of the results with use of sensitivity analysis for the hypothesis that the evidence is insufficient or even contrary to the situation. Therefore, we utilized robust IVW and Penalized robust IVW methods for the inference of consistent and robust casual estimations.

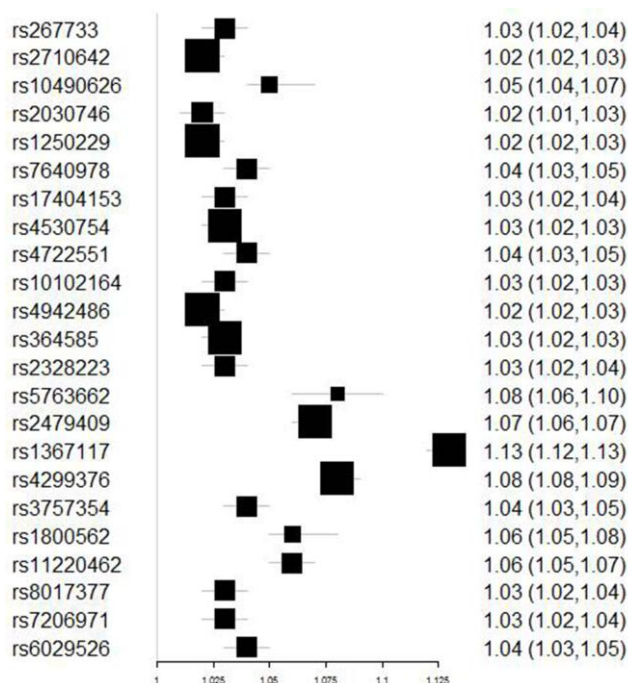

Figure 2. Forest plot of the ORs and 95% CIs of the instrumental variables.

**Table 2. The effect of LDL-C on T2DM estimated using IVW and MR-Egger methods.**

| Method                    | Beta  | Std error | 95% CI |       | P-value |
|---------------------------|-------|-----------|--------|-------|---------|
| IVW                       | 0.250 | 0.074     | 0.105  | 0.395 | 0.001   |
| Penalized IVW             | 0.250 | 0.074     | 0.105  | 0.395 | 0.001   |
| Robust IVW                | 0.240 | 0.078     | 0.087  | 0.393 | 0.002   |
| Penalized robust IVW      | 0.240 | 0.078     | 0.087  | 0.393 | 0.002   |
| MR-Egger                  | 0.062 | 0.146     | -0.224 | 0.348 | 0.670   |
| (intercept)               | 0.011 | 0.007     | -0.003 | 0.025 | 0.135   |
| Penalized MR-Egger        | 0.062 | 0.146     | -0.224 | 0.348 | 0.670   |
| (intercept)               | 0.011 | 0.007     | -0.003 | 0.025 | 0.135   |
| Robust MR-Egger           | 0.070 | 0.078     | -0.082 | 0.222 | 0.367   |
| (intercept)               | 0.010 | 0.006     | -0.001 | 0.021 | 0.072   |
| Penalized robust MR-Egger | 0.070 | 0.078     | -0.082 | 0.222 | 0.367   |
| (intercept)               | 0.010 | 0.006     | -0.001 | 0.021 | 0.072   |

CI, confidence intervals; IVW, inverse-variance weighted; LDL-C, low-density lipoprotein cholesterol; OR, odds ratio; SE, standard error; T2DM, type 2 Diabetes Mellitus.

**Table 3. The sensitivity analysis result of SNPs based on leave-one-out validation.**

| SNP        | Beta  | SE    | 95%CI  |       | P value |
|------------|-------|-------|--------|-------|---------|
| rs267733   | 0.159 | 0.074 | 0.014  | 0.303 | 0.015   |
| rs2710642  | 0.144 | 0.074 | -0.001 | 0.289 | 0.032   |
| rs10490626 | 0.153 | 0.074 | 0.008  | 0.298 | 0.023   |
| rs2030746  | 0.144 | 0.074 | 0      | 0.289 | 0.032   |
| rs1250229  | 0.144 | 0.074 | -0.001 | 0.289 | 0.032   |
| rs7640978  | 0.149 | 0.074 | 0.005  | 0.294 | 0.028   |
| rs17404153 | 0.15  | 0.074 | 0.005  | 0.295 | 0.027   |
| rs4530754  | 0.138 | 0.074 | -0.008 | 0.283 | 0.035   |
| rs4722551  | 0.15  | 0.074 | 0.005  | 0.295 | 0.027   |
| rs10102164 | 0.129 | 0.074 | -0.016 | 0.275 | 0.036   |
| rs4942486  | 0.155 | 0.074 | 0.011  | 0.3   | 0.02    |
| rs364585   | 0.144 | 0.074 | -0.001 | 0.289 | 0.032   |
| rs2328223  | 0.138 | 0.074 | -0.007 | 0.283 | 0.032   |
| rs5763662  | 0.136 | 0.075 | -0.012 | 0.283 | 0.044   |
| rs2479409  | 0.18  | 0.077 | 0.028  | 0.331 | 0.009   |
| rs1367117  | 0.139 | 0.089 | -0.036 | 0.314 | 0.084   |
| rs4299376  | 0.196 | 0.08  | 0.04   | 0.352 | 0.005   |
| rs3757354  | 0.153 | 0.075 | 0.007  | 0.299 | 0.026   |
| rs1800562  | 0.152 | 0.074 | 0.008  | 0.297 | 0.023   |
| rs11220462 | 0.131 | 0.077 | -0.019 | 0.281 | 0.054   |
| rs8017377  | 0.142 | 0.074 | -0.003 | 0.287 | 0.033   |
| rs7206971  | 0.144 | 0.074 | -0.001 | 0.289 | 0.003   |
| rs6029526  | 0.134 | 0.075 | -0.013 | 0.281 | 0.044   |

CI, confidence intervals; SE, standard error.

Robust regression in an inverse-variance weighted method and a simple median of the causal estimates from the individual variants, have considerably improved Type

I error rates compared with conventional methods in a wide variety of scenarios when up to 30% of the genetic variants are invalid instruments [38].

**Table 4. The effect of LDL-C on T1DM estimated using IVW and MR-Egger methods.**

| Method                    | Beta   | Std error | 95% CI |        | P-value |
|---------------------------|--------|-----------|--------|--------|---------|
| IVW                       | 0.019  | 0.014     | -0.009 | 0.048  | 0.178   |
| Penalized IVW             | 0.036  | 0.004     | 0.028  | 0.044  | 0.000   |
| Robust IVW                | 0.014  | 0.009     | -0.003 | 0.031  | 0.099   |
| Penalized robust IVW      | -0.202 | 1.370     | -2.888 | 2.484  | 0.883   |
| MR-Egger                  | 0.014  | 0.021     | -0.028 | 0.056  | 0.511   |
| (intercept)               | 0.011  | 0.031     | -0.050 | 0.073  | 0.716   |
| Penalized MR-Egger        | -0.006 | 0.048     | -0.100 | 0.088  | 0.898   |
| (intercept)               | 0.039  | 0.045     | -0.049 | 0.127  | 0.383   |
| Robust MR-Egger           | 0.011  | 0.011     | -0.010 | 0.031  | 0.319   |
| (intercept)               | 0.009  | 0.027     | -0.044 | 0.062  | 0.729   |
| Penalized robust MR-Egger | 0.038  | 0.003     | 0.033  | 0.043  | 0.000   |
| (intercept)               | -0.091 | 0.009     | -0.108 | -0.074 | 0.000   |

CI, confidence intervals; IVW, inverse-variance weighted; LDL-C, low-density lipoprotein cholesterol; OR, odds ratio; SE, standard error; T1DM, type 1 Diabetes Mellitus.

The advantage of MR analysis is that confounding factors should not be considered when using genetic variation as IVs, because genetic variation is free and not affected by confounding factors. In contrast, confounding factors can seriously affect the results of observational studies. Therefore, most of these observational studies should be adjusted for potential confounding factors. Another possible explanation for the differences in results generated in our current MR study from those of previous clinical trials and meta-analysis may be due to the relative short-term duration of the trials as opposed to lifetime exposures to natural genetic variation, and potentially undefined “off-target effects” of medical treatments on carbohydrate homeostasis [39]. In fact, in response to hypolipidemic drug-cholesteryl ester transfer protein (CETP) inhibitors, which do not detrimentally affect carbohydrate homeostasis, a lower incidence of new-onset DM was reported [40].

Here, we get the inconsistent results using the MR-Egger method. Different methods have their own advantages and disadvantages in terms of consistency of causal effect estimation and effectiveness. Thus, the causal relationship need to be verified using randomized controlled trial (RCT). The results of the MR-Egger method indicate that the selected SNPs may affect the outcome through other pathways, as conclusions from a single method may be somewhat one-sided. This possibility can only be verified with more reliable information, as there are no other statistical methods currently available which can explain whether the selected SNPs have pleiotropic effects. By comparing other disease phenotypes such as insulin resistance [41] and obesity [42], it does not appear that the selected SNPs affected T2DM through

other pathways. Unfortunately, we cannot assess all potential associated pathways, therefore conclusions based on the known information have certain limitations. With future developments of new methods and the increased availability of information, it will be possible to verified whether our selected SNPs have pleiotropic effects.

Results from our two-sample MR approach for the association of LDL-C and T1DM were negative, which indicates that a causality between LDL-C and T1DM was not possible. Such findings are consistent with the phenomenon that patients with type 1 diabetes usually show no dyslipidemia [6].

There exist some limitations in our study. First, racial differences may contribute to inconsistencies in results. Notably, the data on SNPs as associated with LDL-C and T2DM were from European studies, which restricts definitive conclusions for other, non-European, populations. Second, it has been reported that some genetic variations such as those in HMGCR and PCSK9 are also related to changes in body weight and waist to hip ratios, which are known risk factors for new-onset DM [18, 43, 44]. Finally, as a result of unrecognized effects of genotypes on other risk factors, there exists the possibility of residual confounding.

In conclusion, with use of two-sample MR analysis, we established that elevated LDL-C levels were associated with an increased the risk of T2DM, but not T1DM. These findings provide strong evidence for the clinical application of lipid lowering drugs in patients with T2DM as a means to reduce their risk of cardiovascular disease.

## MATERIALS AND METHODS

### Data source

Single nucleotide polymorphisms (SNPs) deemed as IVs in the two-sample MR analysis must satisfy the following criteria for an IV: 1) must be related to the exposure of interest, 2) should be independent of known confounding factors and 3) are not directly related to outcomes due to known confounding factors (Figure 1).

SNPs associated with LDL-C were selected from Henry et al.'s study [34], where the potential causal relationship between lipid traits (total cholesterol, triglyceride, LDL-C and high-density lipoprotein) and risk of colorectal cancer were reported. The relationship between genetic risk scores for lipid traits and colorectal cancer risk was investigated using data from seven previously reported genome-wide association studies (GWAS) of colorectal cancer comprised of 9,254 colorectal cancer cases and 18,386 controls. However, previously identified SNPs were obtained from the Global Lipids Genetics Consortium (GLGC) [45]. This large-scale study examined loci influencing these lipids using genome-wide and custom genotyping arrays in 188,577 individuals of European ancestry, including 94,595 individuals from 23 studies genotyped with GWAS arrays and 93,982 individuals from 37 studies genotyped with the MetaboChip array, and identified 157 loci associated with lipid levels at  $P < 5 \times 10^{-8}$ , including 62 new loci. In this study, we used: 1) SNPs associated at genome-wide significance (i.e.  $P \leq 5.0 \times 10^{-8}$ ), 2) excluded SNPs that were correlated (i.e. Pairwise  $r^2$  value  $\geq 0.01$ ), as extracted in the Henry et al.'s study. Data of SNPs-disease including SNPs-T2DM was sourced from diabetes genetics replication and meta-analysis (DIAGRAM) consortium [46]. This consortium is comprised of a group of investigators with shared interests in performing large-scale studies to characterize the genetic basis of T2DM as focused on samples from individuals of European descent. The initial use of DIAGRAM (DIAGRAM v1) enabled the combination of T2DM genome wide association (GWA) studies from the UK (WTCCC), DGI and FUSION groups [47–49]. An incremental meta-analysis (DIAGRAM v2 or DIAGRAM+) resulted in the addition of five other GWAS of European-descent samples (DGDG, KORA, Rotterdam, DeCODE and EUROSPAN for a total of 8,130 cases and 38,987 controls) together with extensive replication involving 20 other cohorts. In the recent meta-analysis (DIAGRAM v3), 12,171 cases and 56,862 controls were collected [50]. This data set was then used as the basis for the selection of SNPs for T2DM replication of the MetaboChip custom array. Summary data from this

analysis are available at <http://www.diagram-consortium.org>.

### SNPs selection

First of all, the SNPs which were significantly related to LDL-C ( $P \leq 5.0 \times 10^{-8}$ ) as extracted from the Henry et al.'s study were categorized as Set1 (Figure 3). Second, SNPs which were related to T2DM ( $P$  value  $< 5 \times 10^{-2}$ ) were then deleted from Set 1. Remaining SNPs were categorized as Set2 (Figure 3). Finally, SNAP [51] (<https://data.broadinstitute.org/mpg/snpnap/>) was used to eliminate linkage disequilibrium (LD). LD is a phenomenon in which two genes are transmitted simultaneously at different locations in a population significantly higher than that of the expected random frequency. The remaining SNPs without LD, categorized as Set 3, were then deemed as IVs for further MR analysis.

### Sensitivity analysis based on leave-one-out validation

The leave-one-out validation was performed to test the sensitivity of the selected SNPs (IVs). Each of SNP in IVs was removed from the IVs to carry out Penalized robust IVW estimate. And the fluctuation of the results before and after removing the SNP was observed as its sensitivity.

### Perform analysis

Then the two-sample MR procedure was performed, which is named inverse-variance weighted (IVW)

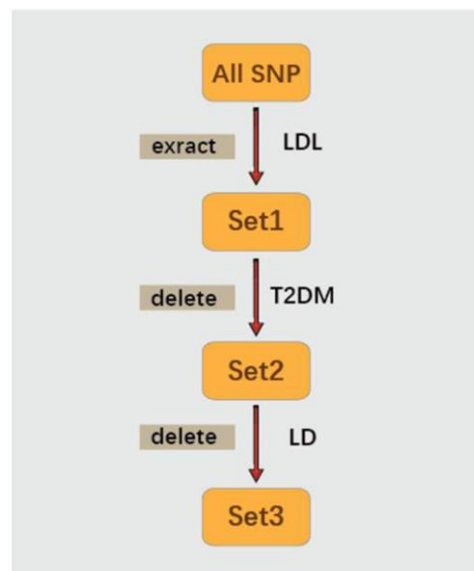

Figure 3. The processes of SNPs selection.

**Table 5. Compositions for the calculation of the odds ratio.**

|          | effective alleles | Non-effective alleles |
|----------|-------------------|-----------------------|
| cases    | a                 | b                     |
| controls | c                 | d                     |

method. The calculation of the odds ratio  $OR = \frac{ad}{bc}$

(Table 5). Correspondingly, the standard error (SE) of OR is calculated to instruct the floating of OR, which is

in  $SE = \sqrt{\frac{1}{a} + \frac{1}{b} + \frac{1}{c} + \frac{1}{d}}$ . All of OR satisfy the normal

distribution, the suggestion of data, whose means equal 0 and the variance equal 1 approximately. Based on the above hypothesis, the 95% confidence interval (CI) can be calculated. The lower OR of CI is  $OR - 1.96 \times SE$ , and the upper of it is shown by  $OR + 1.96 \times SE$ . The conversion of beta and OR appears by  $\beta = \ln OR$  to facilitate our research. The difference of Beta including two terms:  $Beta > 0$  shows that the effective allele is the risk gene, which suggest the result is the correct; while on the other hand,  $Beta < 0$  indicates the risk allele is non-effective gene, which instructs that the Beta must be its turn according the formula of OR. After we got the individual affect of each SNP (IV) on T2DM, further analysis including Penalized IVW, Robust IVW and Penalized robust IVW are also be used to reduce the sensitivity of methods to the influence of outlying variants and provide more robust estimates in large samples [38].

All the statistical processes were performed through the R Package of meta-analysis (<http://cran.r-project.org/web/packages/meta/index.html>) and Mendelian Randomization (<https://cran.r-project.org/web/packages/MendelianRandomization/>) [52].

## AUTHOR CONTRIBUTIONS

YH, HJ, and HJ conceived and designed the experiments. SY and HZ analysed data. WP wrote this manuscript. All authors read and approved the final manuscript.

## CONFLICTS OF INTEREST

The authors declare that they have no conflict of interest.

## FUNDING

This work was supported by the Heilongjiang Postdoctoral Fund (Grant No. LBH-Q17119), National

Natural Science Foundation of China (81671760 and 81873910), Scientific Research Transformation Special Fund of Heilongjiang Academy of Medical Sciences (2018415), Scientific Research Project of Health and Family Planning Commission of Heilong jiang Province (201812 and 201622).

## REFERENCES

1. International Diabetes Federation. IDF Diabetes Atlas. 8th ed. Brussels, Belgium: International Diabetes Federation; 2017.
2. Booth GL, Kapral MK, Fung K, Tu JV. Relation between age and cardiovascular disease in men and women with diabetes compared with non-diabetic people: a population-based retrospective cohort study. *Lancet*. 2006; 368:29–36. [https://doi.org/10.1016/S0140-6736\(06\)68967-8](https://doi.org/10.1016/S0140-6736(06)68967-8) PMID:[16815377](https://pubmed.ncbi.nlm.nih.gov/16815377/)
3. Farmer JA. Diabetic dyslipidemia and atherosclerosis: evidence from clinical trials. *Curr Diab Rep*. 2008; 8:71–77. <https://doi.org/10.1007/s11892-008-0013-2> PMID:[18367002](https://pubmed.ncbi.nlm.nih.gov/18367002/)
4. Stahel P, Xiao C, Hegele RA, Lewis GF. The Atherogenic Dyslipidemia Complex and Novel Approaches to Cardiovascular Disease Prevention in Diabetes. *Can J Cardiol*. 2018; 34:595–604. <https://doi.org/10.1016/j.cjca.2017.12.007> PMID:[29459241](https://pubmed.ncbi.nlm.nih.gov/29459241/)
5. Márk L, Dani G. [Diabetic dyslipidaemia and the atherosclerosis]. *Orv Hetil*. 2016; 157:746–52. <https://doi.org/10.1556/650.2016.30441> PMID:[27133274](https://pubmed.ncbi.nlm.nih.gov/27133274/)
6. Vergès B. Pathophysiology of diabetic dyslipidaemia: where are we? *Diabetologia*. 2015; 58:886–99. <https://doi.org/10.1007/s00125-015-3525-8> PMID:[25725623](https://pubmed.ncbi.nlm.nih.gov/25725623/)
7. American Diabetes Association. (8) Cardiovascular disease and risk management. *Diabetes Care*. 2015; 38:S49–57. <https://doi.org/10.2337/dc15-S011> PMID:[25537708](https://pubmed.ncbi.nlm.nih.gov/25537708/)
8. American Diabetes Association. 9. Cardiovascular disease and risk management: *standards of medical*



- care in diabetes-2018*. Diabetes Care. 2018 (Suppl 1); 41:S86–104.  
<https://doi.org/10.2337/dc18-S009> PMID:29222380
9. Piepoli MF, Hoes AW, Agewall S, Albus C, Brotons C, Catapano AL, Cooney MT, Corrà U, Cosyns B, Deaton C, Graham I, Hall MS, Hobbs FDR, et al; ESC Scientific Document Group. 2016 European Guidelines on cardiovascular disease prevention in clinical practice: The Sixth Joint Task Force of the European Society of Cardiology and Other Societies on Cardiovascular Disease Prevention in Clinical Practice (constituted by representatives of 10 societies and by invited experts)Developed with the special contribution of the European Association for Cardiovascular Prevention and Rehabilitation (EACPR). Eur Heart J. 2016; 37:2315–81.  
<https://doi.org/10.1093/eurheartj/ehw106>  
PMID:27222591
  10. Jellinger PS, Handelsman Y, Rosenblit PD, Bloomgarden ZT, Fonseca VA, Garber AJ, Grunberger G, Guerin CK, Bell DSH, Mechanick JI, Pessah-Pollack R, Wyne K, Smith D, et al. American association of clinical endocrinologists and American college of endocrinology guidelines for management of dyslipidemia and prevention of cardiovascular disease. Endocr Pract. 2017; 23:1–87.  
<https://doi.org/10.4158/EP171764.APPGL>  
PMID:28437620
  11. Sattar N, Preiss D, Murray HM, Welsh P, Buckley BM, de Craen AJ, Seshasai SR, McMurray JJ, Freeman DJ, Jukema JW, Macfarlane PW, Packard CJ, Stott DJ, et al. Statins and risk of incident diabetes: a collaborative meta-analysis of randomised statin trials. Lancet. 2010; 375:735–42.  
[https://doi.org/10.1016/S0140-6736\(09\)61965-6](https://doi.org/10.1016/S0140-6736(09)61965-6)  
PMID:20167359
  12. Ridker PM, Danielson E, Fonseca FA, Genest J, Gotto AM Jr, Kastelein JJ, Koenig W, Libby P, Lorenzatti AJ, MacFadyen JG, Nordestgaard BG, Shepherd J, Willerson JT, Glynn RJ, and JUPITER Study Group. Rosuvastatin to prevent vascular events in men and women with elevated C-reactive protein. N Engl J Med. 2008; 359:2195–207.  
<https://doi.org/10.1056/NEJMoa0807646>  
PMID:18997196
  13. Navarese EP, Buffon A, Andreotti F, Kozinski M, Welton N, Fabiszak T, Caputo S, Grzesk G, Kubica A, Swiatkiewicz I, Sukiennik A, Kelm M, De Servi S, Kubica J. Meta-analysis of impact of different types and doses of statins on new-onset diabetes mellitus. Am J Cardiol. 2013; 111:1123–30.  
<https://doi.org/10.1016/j.amjcard.2012.12.037>  
PMID:23352266
  14. Preiss D, Seshasai SR, Welsh P, Murphy SA, Ho JE, Waters DD, DeMicco DA, Barter P, Cannon CP, Sabatine MS, Braunwald E, Kastelein JJ, de Lemos JA, et al. Risk of incident diabetes with intensive-dose compared with moderate-dose statin therapy: a meta-analysis. JAMA. 2011; 305:2556–64.  
<https://doi.org/10.1001/jama.2011.860>  
PMID:21693744
  15. Agouridis AP, Kostapanos MS, Elisaf MS. Statins and their increased risk of inducing diabetes. Expert Opin Drug Saf. 2015; 14:1835–44.  
<https://doi.org/10.1517/14740338.2015.1096343>  
PMID:26437128
  16. Kei A, Rizos EC, Elisaf M. Statin use in prediabetic patients: rationale and results to date. Ther Adv Chronic Dis. 2015; 6:246–51.  
<https://doi.org/10.1177/2040622315596118>  
PMID:26336593
  17. Kostapanos MS, Agouridis AP, Elisaf MS. Variable effects of statins on glucose homeostasis parameters and their diabetogenic role. Diabetologia. 2015; 58:1960–61.  
<https://doi.org/10.1007/s00125-015-3633-5>  
PMID:26026652
  18. Swerdlow DI, Preiss D, Kuchenbaecker KB, Holmes MV, Engmann JE, Shah T, Sofat R, Stender S, Johnson PC, Scott RA, Leusink M, Verweij N, Sharp SJ, et al, and DIAGRAM Consortium, and MAGIC Consortium, and InterAct Consortium. HMG-coenzyme A reductase inhibition, type 2 diabetes, and bodyweight: evidence from genetic analysis and randomised trials. Lancet. 2015; 385:351–61.  
[https://doi.org/10.1016/S0140-6736\(14\)61183-1](https://doi.org/10.1016/S0140-6736(14)61183-1)  
PMID:25262344
  19. Li N, van der Sijde MR, Bakker SJ, Dullaart RP, van der Harst P, Gansevoort RT, Elbers CC, Wijmenga C, Snieder H, Hofker MH, Fu J, and LifeLines Cohort Study Group. Pleiotropic effects of lipid genes on plasma glucose, HbA1c, and HOMA-IR levels. Diabetes. 2014; 63:3149–58.  
<https://doi.org/10.2337/db13-1800> PMID:24722249
  20. Fall T, Xie W, Poon W, Yaghoobkar H, Mägi R, Knowles JW, Lyssenko V, Weedon M, Frayling TM, Ingelsson E, and GENESIS Consortium. Using Genetic Variants to Assess the Relationship Between Circulating Lipids and Type 2 Diabetes. Diabetes. 2015; 64:2676–84.  
<https://doi.org/10.2337/db14-1710> PMID:25948681
  21. Zeng X, Liu L, Lü L, Zou Q. Prediction of potential disease-associated microRNAs using structural perturbation method. Bioinformatics. 2018; 34:2425–32.  
<https://doi.org/10.1093/bioinformatics/bty112>  
PMID:29490018

22. Cheng L, Yang H, Zhao H, Pei X, Shi H, Sun J, Zhang Y, Wang Z, Zhou M. MetSigDis: a manually curated resource for the metabolic signatures of diseases. *Brief Bioinform.* 2019; 20:203–09. <https://doi.org/10.1093/bib/bbx103> PMID:[28968812](https://pubmed.ncbi.nlm.nih.gov/28968812/)
23. Davey Smith G, Paternoster L, Relton C. When Will Mendelian Randomization Become Relevant for Clinical Practice and Public Health? *JAMA.* 2017; 317:589–91. <https://doi.org/10.1001/jama.2016.21189> PMID:[28196238](https://pubmed.ncbi.nlm.nih.gov/28196238/)
24. Smith GD, Ebrahim S. ‘Mendelian randomization’: can genetic epidemiology contribute to understanding environmental determinants of disease? *Int J Epidemiol.* 2003; 32:1–22. <https://doi.org/10.1093/ije/dyg070> PMID:[12689998](https://pubmed.ncbi.nlm.nih.gov/12689998/)
25. Lawlor DA, Harbord RM, Sterne JA, Timpson N, Davey Smith G. Mendelian randomization: using genes as instruments for making causal inferences in epidemiology. *Stat Med.* 2008; 27:1133–63. <https://doi.org/10.1002/sim.3034> PMID:[17886233](https://pubmed.ncbi.nlm.nih.gov/17886233/)
26. Boef AG, Dekkers OM, le Cessie S. Mendelian randomization studies: a review of the approaches used and the quality of reporting. *Int J Epidemiol.* 2015; 44:496–511. <https://doi.org/10.1093/ije/dyv071> PMID:[25953784](https://pubmed.ncbi.nlm.nih.gov/25953784/)
27. Pagoni P, Dimou NL, Murphy N, Stergiakouli E. Using Mendelian randomisation to assess causality in observational studies. *Evid Based Ment Health.* 2019; 22:67–71. <https://doi.org/10.1136/ebmental-2019-300085> PMID:[30979719](https://pubmed.ncbi.nlm.nih.gov/30979719/)
28. Sheehan NA, Meng S, Didelez V. Mendelian randomisation: a tool for assessing causality in observational epidemiology. *Methods Mol Biol.* 2011; 713:153–66. [https://doi.org/10.1007/978-1-60327-416-6\\_12](https://doi.org/10.1007/978-1-60327-416-6_12) PMID:[21153618](https://pubmed.ncbi.nlm.nih.gov/21153618/)
29. Fukaya E, Flores AM, Lindholm D, Gustafsson S, Zanetti D, Ingelsson E, Leeper NJ. Clinical and Genetic Determinants of Varicose Veins. *Circulation.* 2018; 138:2869–80. <https://doi.org/10.1161/CIRCULATIONAHA.118.035584> PMID:[30566020](https://pubmed.ncbi.nlm.nih.gov/30566020/)
30. Haycock PC, Burgess S, Wade KH, Bowden J, Relton C, Davey Smith G. Best (but oft-forgotten) practices: the design, analysis, and interpretation of Mendelian randomization studies. *Am J Clin Nutr.* 2016; 103:965–78. <https://doi.org/10.3945/ajcn.115.118216> PMID:[26961927](https://pubmed.ncbi.nlm.nih.gov/26961927/)
31. Cheng L, Wang P, Tian R, Wang S, Guo Q, Luo M, Zhou W, Liu G, Jiang H, Jiang Q. LncRNA2Target v2.0: a comprehensive database for target genes of lncRNAs in human and mouse. *Nucleic Acids Res.* 2019; 47:D140–D144. <https://doi.org/10.1093/nar/gky1051> PMID:[30380072](https://pubmed.ncbi.nlm.nih.gov/30380072/)
32. Cheng L, Qi C, Zhuang H, Fu T, Zhang X. gutMDisorder: a comprehensive database for dysbiosis of the gut microbiota in disorders and interventions. *Nucleic Acids Res.* 2020; 48:D554–D560. <https://doi.org/10.1093/nar/gkz843> PMID:[31584099](https://pubmed.ncbi.nlm.nih.gov/31584099/)
33. Cheng L, Sun J, Xu W, Dong L, Hu Y, Zhou M. OAHG: an integrated resource for annotating human genes with multi-level ontologies. *Sci Rep.* 2016; 6:34820. <https://doi.org/10.1038/srep34820> PMID:[27703231](https://pubmed.ncbi.nlm.nih.gov/27703231/)
34. Rodriguez-Broadbent H, Law PJ, Sud A, Palin K, Tuupainen S, Gylfe A, Hänninen UA, Cajuso T, Tanskanen T, Kondelin J, Kaasinen E, Sarin AP, Ripatti S, et al. Mendelian randomisation implicates hyperlipidaemia as a risk factor for colorectal cancer. *Int J Cancer.* 2017; 140:2701–08. <https://doi.org/10.1002/ijc.30709> PMID:[28340513](https://pubmed.ncbi.nlm.nih.gov/28340513/)
35. Andersson C, Lyass A, Larson MG, Robins SJ, Vasan RS. Low-density-lipoprotein cholesterol concentrations and risk of incident diabetes: epidemiological and genetic insights from the Framingham Heart Study. *Diabetologia.* 2015; 58:2774–80. <https://doi.org/10.1007/s00125-015-3762-x> PMID:[26409460](https://pubmed.ncbi.nlm.nih.gov/26409460/)
36. Janghorbani M, Soltanian N, Amini M, Aminorroaya A. Low-density lipoprotein cholesterol and risk of type 2 diabetes: the Isfahan diabetes prevention study. *Diabetes Metab Syndr.* 2018; 12:715–19. <https://doi.org/10.1016/j.dsx.2018.04.019> PMID:[29699950](https://pubmed.ncbi.nlm.nih.gov/29699950/)
37. Ference BA, Robinson JG, Brook RD, Catapano AL, Chapman MJ, Neff DR, Voros S, Giugliano RP, Davey Smith G, Fazio S, Sabatine MS. Variation in PCSK9 and HMGCR and Risk of Cardiovascular Disease and Diabetes. *N Engl J Med.* 2016; 375:2144–53. <https://doi.org/10.1056/NEJMoa1604304> PMID:[27959767](https://pubmed.ncbi.nlm.nih.gov/27959767/)
38. Burgess S, Bowden J, Dudbridge F, Thompson SG. Robust instrumental variable methods using multiple candidate instruments with application to Mendelian randomization. *Methodology.* 2016.
39. Filippatos TD, Panagiotopoulou T, Tzavella E, Elisaf MS. Hypolipidemic Drugs and Diabetes Mellitus-Mechanisms and Data From Genetic Trials. *J Cardiovasc Pharmacol Ther.* 2018; 23:187–91. <https://doi.org/10.1177/1074248418757011> PMID:[29409336](https://pubmed.ncbi.nlm.nih.gov/29409336/)

40. Bowman L, Hopewell JC, Chen F, Wallendszus K, Stevens W, Collins R, Wiviott SD, Cannon CP, Braunwald E, Sammons E, Landray MJ, and HPS3/TIMI55–REVEAL Collaborative Group. Effects of Anacetrapib in Patients with Atherosclerotic Vascular Disease. *N Engl J Med*. 2017; 377:1217–27. <https://doi.org/10.1056/NEJMoa1706444> PMID:28847206
41. Yaghootkar H, Lamina C, Scott RA, Dastani Z, Hivert MF, Warren LL, Stancáková A, Buxbaum SG, Lyytikäinen LP, Henneman P, Wu Y, Cheung CY, Pankow JS, et al, and GENESIS Consortium, and RISC Consortium. Mendelian randomization studies do not support a causal role for reduced circulating adiponectin levels in insulin resistance and type 2 diabetes. *Diabetes*. 2013; 62:3589–98. <https://doi.org/10.2337/db13-0128> PMID:23835345
42. Cheng L, Zhuang H, Ju H, Yang S, Han J, Tan R, Hu Y. Exposing the causal effect of body mass index on the risk of type 2 diabetes mellitus: a mendelian randomization study. *Front Genet*. 2019; 10:94. <https://doi.org/10.3389/fgene.2019.00094> PMID:30891058
43. Schmidt AF, Swerdlow DI, Holmes MV, Patel RS, Fairhurst-Hunter Z, Lyall DM, Hartwig FP, Horta BL, Hyppönen E, Power C, Moldovan M, van Iperen E, Hovingh GK, et al, and LifeLines Cohort study group, and UCLEB consortium. PCSK9 genetic variants and risk of type 2 diabetes: a mendelian randomisation study. *Lancet Diabetes Endocrinol*. 2017; 5:97–105. [https://doi.org/10.1016/S2213-8587\(16\)30396-5](https://doi.org/10.1016/S2213-8587(16)30396-5) PMID:27908689
44. Filippatos TD, Filippas-Ntekouan S, Pappa E, Panagiotopoulou T, Tsimihodimos V, Elisaf MS. PCSK9 and carbohydrate metabolism: A double-edged sword. *World J Diabetes*. 2017; 8:311–16. <https://doi.org/10.4239/wjd.v8.i7.311> PMID:28751953
45. Willer CJ, Schmidt EM, Sengupta S, Peloso GM, Gustafsson S, Kanoni S, Ganna A, Chen J, Buchkovich ML, Mora S, Beckmann JS, Bragg-Gresham JL, Chang HY, et al, and Global Lipids Genetics Consortium. Discovery and refinement of loci associated with lipid levels. *Nat Genet*. 2013; 45:1274–83. <https://doi.org/10.1038/ng.2797> PMID:24097068
46. Zeggini E, Scott LJ, Saxena R, Voight BF, Marchini JL, Hu T, de Bakker PI, Abecasis GR, Almgren P, Andersen G, Ardlie K, Boström KB, Bergman RN, et al, and Wellcome Trust Case Control Consortium. Meta-analysis of genome-wide association data and large-scale replication identifies additional susceptibility loci for type 2 diabetes. *Nat Genet*. 2008; 40:638–45. <https://doi.org/10.1038/ng.120> PMID:18372903
47. Voight BF, Scott LJ, Steinthorsdottir V, Morris AP, Dina C, Welch RP, Zeggini E, Huth C, Aulchenko YS, Thorleifsson G, McCulloch LJ, Ferreira T, Grallert H, et al, and MAGIC investigators, and GIANT Consortium. Twelve type 2 diabetes susceptibility loci identified through large-scale association analysis. *Nat Genet*. 2010; 42:579–89. <https://doi.org/10.1038/ng.609> PMID:20581827
48. Dupuis J, Langenberg C, Prokopenko I, Saxena R, Soranzo N, Jackson AU, Wheeler E, Glazer NL, Bouatia-Naji N, Gloyn AL, Lindgren CM, Mägi R, Morris AP, et al, and DIAGRAM Consortium, and GIANT Consortium, and Global BPgen Consortium, and Anders Hamsten on behalf of Procardis Consortium, and MAGIC investigators. New genetic loci implicated in fasting glucose homeostasis and their impact on type 2 diabetes risk. *Nat Genet*. 2010; 42:105–16. <https://doi.org/10.1038/ng.520> PMID:20081858
49. Saxena R, Hivert MF, Langenberg C, Tanaka T, Pankow JS, Vollenweider P, Lyssenko V, Bouatia-Naji N, Dupuis J, Jackson AU, Kao WH, Li M, Glazer NL, et al, and GIANT consortium, and MAGIC investigators. Genetic variation in GIPR influences the glucose and insulin responses to an oral glucose challenge. *Nat Genet*. 2010; 42:142–48. <https://doi.org/10.1038/ng.521> PMID:20081857
50. Morris AP, Voight BF, Teslovich TM, Ferreira T, Segrè AV, Steinthorsdottir V, Strawbridge RJ, Khan H, Grallert H, Mahajan A, Prokopenko I, Kang HM, Dina C, et al, and DIABetes Genetics Replication And Meta-analysis (DIAGRAM) Consortium. Large-scale association analysis provides insights into the genetic architecture and pathophysiology of type 2 diabetes. *Nat Genet*. 2012; 44:981–90. <https://doi.org/10.1038/ng.2383> PMID:22885922
51. Johnson AD, Handsaker RE, Pulit SL, Nizzari MM, O'Donnell CJ, de Bakker PI. SNAP: a web-based tool for identification and annotation of proxy SNPs using HapMap. *Bioinformatics*. 2008; 24:2938–39. <https://doi.org/10.1093/bioinformatics/btn564> PMID:18974171
52. Yavorska OO, Burgess S. MendelianRandomization: an R package for performing Mendelian randomization analyses using summarized data. *Int J Epidemiol*. 2017; 46:1734–39. <https://doi.org/10.1093/ije/dyx034> PMID:28398548
